# Supplementary material
Source: PubMed Central journal article supplement (PMC3482507)
Supplement: NIHMS389331-supplement-Supp_Table_S1-S3.pdf [file NIHMS389331-supplement-Supp_Table_S1-S3.pdf]

**Table S1.** Rh antigens expressed by variants of both Rh proteins, RhD and RhCE

| <b>Antigen</b> | <b>Rh protein</b>        | <b>Allele name</b>         | <b>Molecular basis*</b>                           | <b>Comment</b>                                           |
|----------------|--------------------------|----------------------------|---------------------------------------------------|----------------------------------------------------------|
| c (RH4)        | RhCE                     | <i>RHce, RHcE</i>          | 103P (307C) is critical                           | requirements for antigen expression not fully understood |
|                | RhD                      | unnamed <i>RHD</i> (S103P) | 103P (307C)                                       | c antigen not confirmed yet                              |
|                |                          | <i>DIIIb</i>               | <i>RHD-CE(2)-D</i>                                | <i>cDe</i>                                               |
|                |                          | <i>DIII type 7</i>         | <i>RHD-CE(2)-D</i> and dispersed mutations        | <i>cDe</i>                                               |
|                |                          | <i>DVII type 2</i>         | 103P (307C), 110P (329C)                          | <i>C(c)De</i> , c antigen confirmed                      |
|                | <i>RHCE(1-3)-D(4-10)</i> | <i>RHCE(1-3)-D(4-10)</i>   | <i>cDE</i>                                        |                                                          |
| G (RH12)       | RhCE                     | <i>RHce, RHCE</i>          | 103S (307T) is standard for C and D               | G negative, if 103P (307C)                               |
|                | RhD                      | <i>RHD</i>                 | 103S (307T) is standard for C and D               | G negative, if 103P (307C)                               |
| c-like (RH26)  | RhCE                     | <i>RHce</i>                | 96G (286G), on Rhce only                          | RH26 negative, if 96S                                    |
|                | RhD                      | unnamed <i>RHD</i> (S96G)  | 96G (286G)                                        | c antigen not confirmed yet                              |
| Rh32 (RH32)    | RhCE                     | <i>RHCE-D(4)-CE</i>        | <i>RHCE-D(4)-CE</i>                               | with or without T152N (445C>A)                           |
|                | RhD                      | <i>DBT-1</i>               | <i>RHD-CE(5-7)-D</i>                              | hybrid in <i>RHD</i>                                     |
|                |                          | <i>DBT-2</i>               | <i>RHD-CE(5-9)-D</i>                              | hybrid in <i>RHD</i>                                     |
| Evans (RH37)   | RhCE                     | <i>Dav</i>                 | <i>RHD(1-6)-CE</i>                                | hybrid in <i>RHCE</i>                                    |
|                |                          | <i>JD</i>                  | <i>RHD(1 to part of 6)-CE</i> or <i>RHCE(1)-D</i> | hybrid in <i>RHCE</i>                                    |
|                |                          | <i>AT</i>                  | <i>RHCE-D(2-6)-CE</i>                             | hybrid in <i>RHCE</i>                                    |
|                | RhD                      | <i>DIVb</i>                | <i>RHD-CE(part of 7 to 9)-D</i>                   | hybrid in <i>RHD</i>                                     |
| FPTT (RH50)    | RhCE                     | <i>DHAR</i>                | <i>RHce-D(5)-ce</i>                               | also Rh33 positive                                       |
|                | RhD                      | <i>DFR</i>                 | <i>RHD-CE(4)-D</i>                                | hybrid in <i>RHD</i>                                     |

\* The molecular basis is shown as amino acid substitution (nucleotide substitution) or as description of the hybrid.

**Table S2.** Pairs of *RHCE* and *RHD* alleles harboring identical single nucleotide substitutions that are known to encode low-prevalence Rh antigens

| Nucleotide substitution | Amino acid substitution | <i>RHCE</i> alleles                                                         | <i>RHD</i> alleles                 |
|-------------------------|-------------------------|-----------------------------------------------------------------------------|------------------------------------|
| 340C>T                  | R114W                   | <i>CeMA</i> <sup>1,2</sup> and <i>ce</i> <sup>s</sup> (340) <sup>1,2*</sup> | <i>Weak D type 17</i> <sup>6</sup> |
| 341G>A                  | R114Q                   | <i>RHce</i> (R114Q) <sup>2</sup>                                            | <i>Weak D type 25</i>              |
| 340C>G                  | R114G                   | not described                                                               | <i>Weak D type 47</i>              |
| 365C>T                  | S122L                   | <i>RHce</i> (S122L) <sup>3</sup> and <i>ceSL</i> <sup>4</sup>               | <i>Weak D type 54</i>              |

\* Additional RhD-like amino acid substitution L245V

**Table S3.** Discussion of suggested molecular causes of various JAL antigen densities based on the current homology model<sup>1</sup>

| RhCE variant          | Amino acid position |     |      | JAL expression      | Comment                                                                                                                                                                                                                                                                                                                           |
|-----------------------|---------------------|-----|------|---------------------|-----------------------------------------------------------------------------------------------------------------------------------------------------------------------------------------------------------------------------------------------------------------------------------------------------------------------------------|
|                       | 16                  | 114 | 245  |                     |                                                                                                                                                                                                                                                                                                                                   |
| RhCe                  | Cys                 | Arg | Leu  | no                  | Reference structure of Ce. The hydrophilic Arg114 is suggested to extend to the membrane surface (“snorkeling”) and to form potentially a hydrogen bond with the helix-capping and e-specific Ala226 residue. <sup>1</sup>                                                                                                        |
| Rhce                  | Trp/Cys*            | Arg | Leu  | no                  | Reference structure of ce. The same comment for Arg114 as in RhCe. <sup>1</sup>                                                                                                                                                                                                                                                   |
| ce <sup>s</sup>       | Cys/Trp†            | Arg | Val‡ | no                  | Leu245Val causes expression of V and VS antigens and contributes to weak e. <sup>8</sup>                                                                                                                                                                                                                                          |
| CeMA                  | Cys                 | Trp | Leu  | strong <sup>2</sup> | The hydrophobic Trp114 is more probable to remain within the phospholipid bilayer than the membrane surface. The large, bulky aromatic side chain is likely to be associated with structural displacement. <sup>1</sup>                                                                                                           |
| Rhce(R114Q)           | Trp                 | Gln | Leu  | weak <sup>2</sup>   | The hydrophilic Gln114 may extend to the membrane surface (“snorkeling”) like the hydrophilic Arg114. However, the shorter side chain of Gln may prevent formation of the hydrogen bond with Ala226, which is possible with the larger side chain of Arg. Further, Gln may cause less structural displacement than the bulky Trp. |
| ce <sup>s</sup> (340) | Trp                 | Trp | Val‡ | weak <sup>2</sup>   | Like in CeMA, the Trp114 may remain in the bilayer. In difference to CeMA, however, the JAL antigen is weak. <sup>2</sup> This may be caused by the additional Leu245Val, which is known to weaken the e antigen in ce <sup>s</sup> . No or only weak expression of V and VS antigens.                                            |

\* Trp16 in the RhCE protein is usually but not exclusively associated with the c antigen. However, two thirds of the *cDe* haplotypes expressing a normal c antigen have Cys16. However, e is altered in these persons.

† There are ce<sup>s</sup> variants with Cys16 and Trp16. Cys16 is associated with altered e antigen in ce variants.

‡ Leu245Val is a RhD-like amino acid substitution
